# Supplementary material for: Gene Expression and MicroRNA Expression Analysis in Small Arteries of Spontaneously Hypertensive Rats. Evidence for ER Stress
Source: PubMed Central journal article supplement (PMC4565692; doi:10.1371/journal.pone.0137027), 2015-09-10
Supplement: pone.0137027.s001.pdf [file pone.0137027.s001.pdf]

### Diseases and Disorders

| SHR vs WKY 6 weeks                     |                     |             |
|----------------------------------------|---------------------|-------------|
| Name                                   | p-value             | # Molecules |
| Cardiovascular Disease                 | 3.78E-07 - 4.89E-02 | 5           |
| Connective Tissue Disorders            | 3.78E-07 - 1.23E-02 | 9           |
| Dermatological Diseases and Conditions | 3.78E-07 - 2.09E-03 | 8           |
| Inflammatory Disease                   | 3.78E-07 - 1.23E-02 | 7           |
| Skeletal and Muscular Disorders        | 3.78E-07 - 1.23E-02 | 5           |

| SHR vs WKY 5 months                 |                     |             |
|-------------------------------------|---------------------|-------------|
| Name                                | p-value             | # Molecules |
| Cancer                              | 1.27E-18 - 4.64E-02 | 22          |
| Organismal Injury and Abnormalities | 1.27E-18 - 4.64E-02 | 20          |
| Reproductive System Disease         | 1.27E-18 - 3.99E-02 | 18          |
| Connective Tissue Disorders         | 1.99E-17 - 1.90E-02 | 13          |
| Endocrine System Disorders          | 4.82E-15 - 6.76E-03 | 18          |

### Physiological system development and function

| SHR vs WKY 6 weeks                            |                     |             |
|-----------------------------------------------|---------------------|-------------|
| Name                                          | p-value             | # Molecules |
| Embryonic Development                         | 1.04E-03 - 1.18E-03 | 3           |
| Hair and Skin Development and Function        | 1.04E-03 - 2.07E-02 | 1           |
| Hematological System Development and Function | 1.04E-03 - 4.79E-02 | 3           |
| Immune Cell Trafficking                       | 1.04E-03 - 1.04E-03 | 1           |
| Nervous System Development and Function       | 1.04E-03 - 1.04E-03 | 1           |

### Molecular and Cellular Functions

| SHR vs WKY 6 weeks                     |                     |             |
|----------------------------------------|---------------------|-------------|
| Name                                   | p-value             | # Molecules |
| Cell Death and Survival                | 1.04E-03 - 1.96E-02 | 3           |
| Cell-To-Cell Signaling and Interaction | 1.04E-03 - 1.04E-03 | 3           |
| Cellular Assembly and Organization     | 1.04E-03 - 1.04E-03 | 1           |
| Cellular Development                   | 1.04E-03 - 3.99E-02 | 5           |
| Cellular Function and Maintenance      | 1.04E-03 - 4.79E-02 | 2           |

| SHR vs WKY 5 months                    |                     |             |
|----------------------------------------|---------------------|-------------|
| Name                                   | p-value             | # Molecules |
| Cell Cycle                             | 1.77E-06 - 4.38E-02 | 7           |
| Cellular Development                   | 5.30E-06 - 3.86E-02 | 16          |
| Cell-To-Cell Signaling and Interaction | 7.91E-05 - 3.08E-02 | 6           |
| Cellular Growth and Proliferation      | 7.91E-05 - 3.86E-02 | 14          |
| Cellular Movement                      | 1.70E-04 - 4.58E-02 | 7           |

| SHR vs WKY 5 months                           |                     |             |
|-----------------------------------------------|---------------------|-------------|
| Name                                          | p-value             | # Molecules |
| Hematological System Development and Function | 5.30E-06 - 3.47E-02 | 9           |
| Hematopoiesis                                 | 5.30E-06 - 3.47E-02 | 8           |
| Lymphoid Tissue Structure and Development     | 5.30E-06 - 2.14E-02 | 4           |
| Tissue Development                            | 1.06E-05 - 2.94E-02 | 11          |
| Tissue Morphology                             | 2.98E-04 - 3.99E-02 | 5           |

### Top Networks

| SHR vs WKY 6 weeks                                                                                 |       |
|----------------------------------------------------------------------------------------------------|-------|
| Associated Network Functions                                                                       | score |
| Cancer. Endocrine System Disorders. Gastrointestinal Disease                                       | 30    |
| Cell Death and Survival. Cell-To-Cell Signaling and Interaction. Cellular Growth and Proliferation | 11    |
| Developmental Disorder. Hereditary Disorder. Skeletal and Muscular Disorders                       | 3     |
| Cardiac Fibrosis. Cardiovascular Disease. Organismal Injury and Abnormalities                      | 3     |

| SHR vs WKY 5 months                                                      |       |
|--------------------------------------------------------------------------|-------|
| Associated Network Functions                                             | score |
| Cancer. Organismal Injury and Abnormalities. Reproductive System Disease | 42    |
| Cancer. Hematological Disease. Hereditary Disorder                       | 21    |
| Endocrine System Disorders. Gastrointestinal Disease. Metabolic Disease  | 3     |
