# Supplementary material for: Gene Expression and MicroRNA Expression Analysis in Small Arteries of Spontaneously Hypertensive Rats. Evidence for ER Stress
Source: PubMed Central journal article supplement (PMC4565692; doi:10.1371/journal.pone.0137027), 2015-09-10
Supplement: pone.0137027.s002.pdf [file pone.0137027.s002.pdf]

### Top canonical pathways

| WKY 5 months vs 6 weeks                             |          |                |
|-----------------------------------------------------|----------|----------------|
| Name                                                | p-value  | ratio          |
| Hepatic Fibrosis / Hepatic Stellate Cell Activation | 1.63E-13 | 36/197 (0.183) |
| Atherosclerosis Signaling                           | 7.81E-11 | 25/123 (0.203) |
| Intrinsic Prothrombin Activation Pathway            | 1.53E-08 | 11/29 (0.379)  |
| Granulocyte Adhesion and Diapedesis                 | 1.77E-07 | 25/177 (0.141) |
| Mitotic Roles of Polo-Like Kinase                   | 6.65E-07 | 14/66 (0.212)  |

| SHR 5 months vs 6 weeks                             |          |                |
|-----------------------------------------------------|----------|----------------|
| Name                                                | p-value  | ratio          |
| Hepatic Fibrosis / Hepatic Stellate Cell Activation | 3.42E-13 | 41/197 (0.208) |
| Atherosclerosis Signaling                           | 4.09E-11 | 29/123 (0.236) |
| Granulocyte Adhesion and Diapedesis                 | 2.58E-07 | 29/177 (0.164) |
| Glutathione-mediated Detoxification                 | 1.77E-06 | 10/28 (0.357)  |
| Triacylglycerol Biosynthesis                        | 2.29E-06 | 11/35 (0.314)  |

### Top Networks

| WKY 5 months vs 6 weeks                                                                                  |       |
|----------------------------------------------------------------------------------------------------------|-------|
| Associated Network Functions                                                                             | score |
| Cell Cycle, Cellular Assembly and Organization, DNA Replication, Recombination, and Repair               | 37    |
| Cell Cycle, Cellular Assembly and Organization, DNA Replication, Recombination, and Repair               | 35    |
| Tissue Development, Cancer, Cell-To-Cell Signaling and Interaction                                       | 33    |
| Connective Tissue Disorders, Inflammatory Disease, Neurological Disease                                  | 33    |
| Connective Tissue Disorders, Dermatological Diseases and Conditions, Organismal Injury and Abnormalities | 31    |

| SHR 5 months vs 6 weeks                                                                                |       |
|--------------------------------------------------------------------------------------------------------|-------|
| Associated Network Functions                                                                           | score |
| Carbohydrate Metabolism, Drug Metabolism, Molecular Transport                                          | 41    |
| Cell Cycle, Cellular Assembly and Organization, DNA Replication, Recombination, and Repair             | 34    |
| Molecular Transport, Visual System Development and Function, Cardiac Arrhythmia                        | 32    |
| Cell-To-Cell Signaling and Interaction, Cell Signaling, Cardiovascular System Development and Function | 32    |
| Organ Morphology, Organismal Development, Reproductive System Development and Function                 | 30    |

### Molecular and Cellular Functions

| WKY 5 months vs 6 weeks           |                     |             |
|-----------------------------------|---------------------|-------------|
| Name                              | p-value             | # molecules |
| Cellular Growth and Proliferation | 3.61E-22 - 2.72E-05 | 347         |
| Cellular Movement                 | 1.70E-18 - 2.68E-05 | 240         |
| Cell Cycle                        | 7.58E-17 - 2.27E-05 | 152         |
| Cell Morphology                   | 6.43E-16 - 2.47E-05 | 228         |
| Cell Death and Survival           | 1.48E-15 - 1.55E-05 | 302         |

| SHR 5 months vs 6 weeks           |                     |             |
|-----------------------------------|---------------------|-------------|
| Name                              | p-value             | # molecules |
| Cellular Movement                 | 5.04E-35 - 2.09E-07 | 321         |
| Cellular Growth and Proliferation | 7.05E-30 - 1.51E-07 | 459         |
| Cell Morphology                   | 9.52E-29 - 1.88E-07 | 348         |
| Lipid Metabolism                  | 1.23E-23 - 1.95E-07 | 231         |
| Small Molecule Biochemistry       | 1.23E-23 - 2.02E-07 | 300         |

### Physiological system development and function

| WKY 5 months vs 6 weeks                        |                     |             |
|------------------------------------------------|---------------------|-------------|
| Name                                           | p-value             | # Molecules |
| Organismal Survival                            | 1.21E-16 - 1.55E-04 | 144         |
| Cardiovascular System Development and Function | 1.59E-15 - 2.51E-05 | 159         |
| Organismal Development                         | 1.59E-15 - 2.51E-05 | 244         |
| Tissue Development                             | 1.32E-14 - 2.72E-05 | 291         |
| Tissue Morphology                              | 2.01E-14 - 2.14E-05 | 227         |

| SHR 5 months vs 6 weeks                        |                     |             |
|------------------------------------------------|---------------------|-------------|
| Name                                           | p-value             | # Molecules |
| Cardiovascular System Development and Function | 1.34E-34 - 2.08E-07 | 285         |
| Organismal Development                         | 1.34E-34 - 1.51E-07 | 417         |
| Tissue Morphology                              | 7.91E-26 - 1.88E-07 | 344         |
| Organismal Survival                            | 4.09E-24 - 6.67E-08 | 323         |
| Immune Cell Trafficking                        | 1.08E-22 - 2.10E-07 | 191         |
